# Supplementary material for: Eco-Restoration of Coal Mine Spoil: Biochar Application and Carbon Sequestration for Achieving UN Sustainable Development Goals 13 and 15
Source: MDPI journal article supplement (doi:10.3390/land10111112), 2021-10-20
Supplement: s1 [file s1]

## Supplementary Article

$$\text{Frequency} = \frac{\text{Total number of quadrats in which species occurred}}{\text{Total number of quadrats studied}} \times 100$$

$$\text{Relative Frequency (\%)} = \frac{\text{Frequency of species}}{\text{Sum frequency of all species}} \times 100$$

$$\text{Relative frequency} = \frac{\text{frequency of species}}{\text{sum frequency of all species}} \times 100$$

$$\text{Density (individual per unit area)} = \frac{\text{Total number of individuals of the species}}{\text{Total number of quadrats studied}}$$

$$\text{Density (per ha)} = \frac{\text{Density}}{\text{Quadrat area}} \times 10000$$

$$\text{Abundance} = \frac{\text{Total number of individuals of the species}}{\text{Total number of quadrats in which species occurred}}$$

$$\text{Relative Abundance (\%)} = \frac{\text{Total number of individuals of the species}}{\text{Total number of individual of all species recorded}} \times 100$$

$$\text{Relative density (\%)} = \frac{\text{Number of individual plant species}}{\text{Total number of species in a quadrat}} \times 100$$

$$\text{Importance value index (IVI)} = \text{Relative density} + \text{Relative frequency} + \text{Relative abundance}.$$

**Table S1.** List of species recorded in quadrats of RMS sites showing some biodiversity parameters.

| Name of Species            | Frequency (%) | Relative Frequency (%) | Abundance | Relative Abundance | Density (individuals/unit area) | Density/ha | Relative density (%) | IVI    |
|----------------------------|---------------|------------------------|-----------|--------------------|---------------------------------|------------|----------------------|--------|
| <i>Bambusa arundinacea</i> | 100           | 14.29                  | 40.3      | 51.40              | 40.3                            | 4033.3     | 55.5                 | 121.19 |
| <i>Albizia spp.</i>        | 100           | 14.29                  | 14        | 17.86              | 14                              | 1400       | 17.6                 | 49.74  |
| <i>Dalbergia sissoo</i>    | 100           | 14.29                  | 8.3       | 10.59              | 8.3                             | 833.3      | 10.5                 | 35.37  |
| <i>Psidium guajava</i>     | 66.7          | 9.53                   | 2         | 2.55               | 1.3                             | 133.3      | 1.7                  | 13.78  |
| <i>Butea Monosperma</i>    | 33.3          | 4.76                   | 1         | 1.28               | 0.3                             | 33.3       | 0.4                  | 6.43   |
| <i>Phyllanthus emblica</i> | 33.3          | 4.76                   | 3         | 3.83               | 1                               | 100        | 1.3                  | 9.88   |
| <i>Zizyphus mauritiana</i> | 100           | 14.29                  | 3.3       | 4.21               | 3.3                             | 333.3      | 4.2                  | 22.69  |
| <i>Azadirachta indica</i>  | 66.7          | 9.53                   | 3         | 3.83               | 2                               | 200        | 2.5                  | 15.86  |
| <i>Bauhunia veriegata</i>  | 66.7          | 9.53                   | 2.5       | 3.19               | 1.7                             | 166.7      | 2.1                  | 14.82  |
| <i>Alstonia scholaris</i>  | 33.3          | 4.76                   | 1         | 1.28               | 0.3                             | 33.3       | 0.4                  | 6.43   |
